# Supplementary material for: Growth of Anisotropic Gold Nanoparticle Assemblies via Liposome Fusion
Source: MDPI journal article supplement (doi:10.3390/ma10111317), 2017-11-17
Supplement: s1 [file s1]

Supplementary Materials

# **Growth of Anisotropic Gold Nanoparticle Assemblies via Liposome Fusion**

Kouta Sugikawa\*, Tatsuya Kadota, Kotaro Matsuo, Kazuma Yasuhara, and Atsushi Ikeda\*

Department of Applied Chemistry, Graduate School of Engineering, Hiroshima University,  
Higashi-Hiroshima 739-8527, Japan

Graduate School of Materials Science, Nara Institute of Science and Technology, Nara 630-0192, Japan

## FIGURES

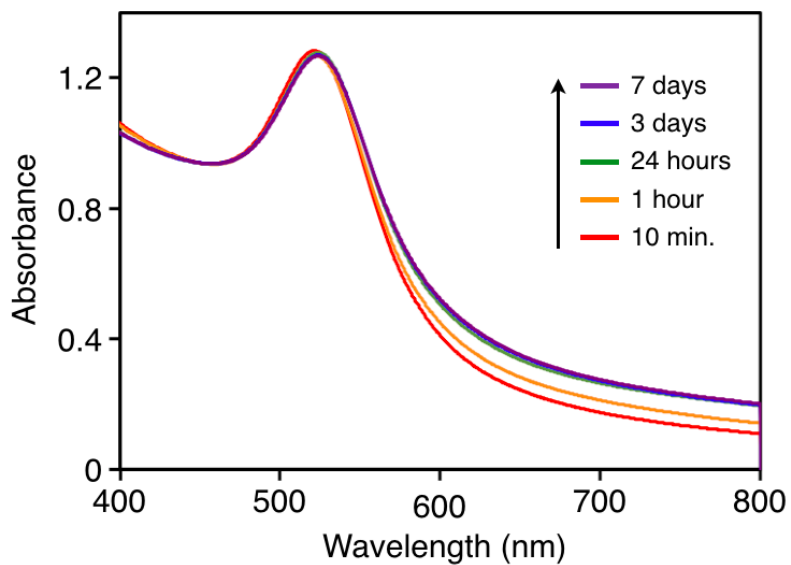

**Figure S1.** Time-dependent UV-vis absorption spectra of cAuNP<sub>14</sub>-DPPC solution ( $[cAuNP]/[liposome] = 1.67$ ) heated at 25 °C for 10 min to 7 days.

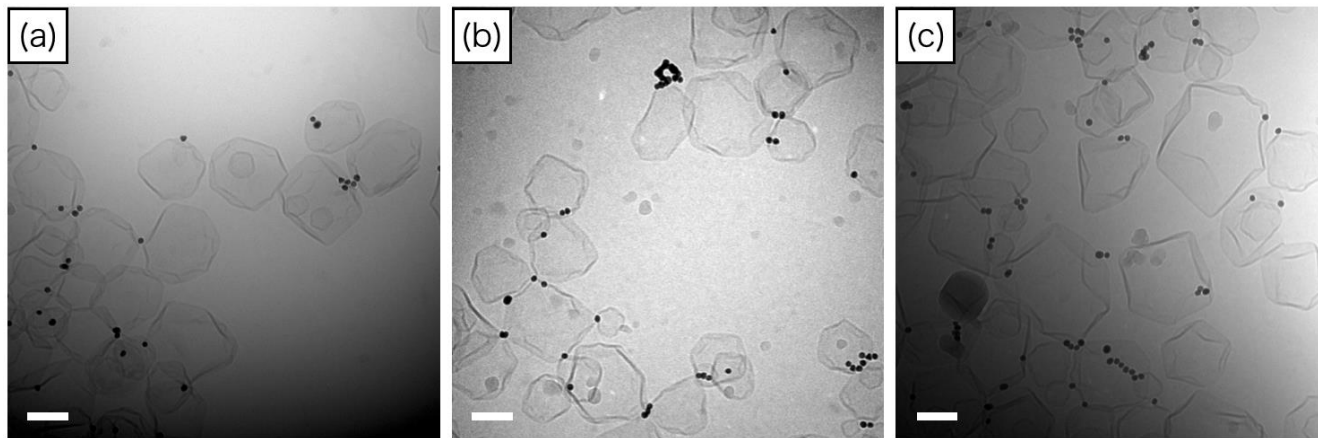

**Figure S2.** Cryo-TEM images of cAuNP<sub>14</sub>-DPPC (a) before and after (b) 1 day and (c) 7 days heating at 50 °C. The scale bars are 100 nm.

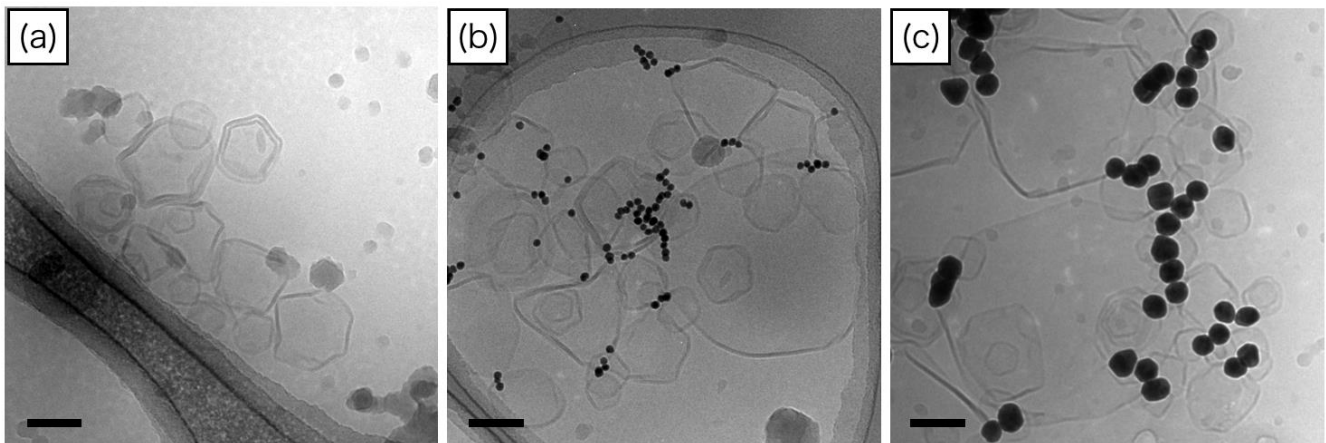

**Figure S3.** Cryo-TEM images of DPPC liposomes heated at 50 °C for 24 h in the (a) absence and presence of (b) cAuNP<sub>14</sub> and (c) cAuNP<sub>31</sub>. The scale bars are 100 nm.
